# Supplementary material for: Unpacking the Black Box of Training Effectiveness: A Structural Equation Modelling Analysis
Source: Research Square preprint supplement (doi:10.21203/rs.3.rs-8463447/v1), 2026-01-22
Supplement: Supplementary file 1 [file 082e10a2216379b6f23113b7.docx]

**Figure 1 Initial Hypothesised Model based on EFA Factors**

**Figure 2 Final Refined Structural Equation Model with Standardised Path Coefficients**

**Supplementary Figure 1 Model with Modification Indicates**
