# Supplementary material for: Unpacking the Black Box of Training Effectiveness: A Structural Equation Modelling Analysis
Source: Research Square preprint supplement (doi:10.21203/rs.3.rs-8463447/v1), 2026-01-22
Supplement: Supplementary file 2 [file 45adc19984f9df2d05c67130.docx]

**Table 2. Demographic Characteristics of Participants (N=148)**

| **Characteristic** | **N (%) or Mean (SD)** |
| --- | --- |
| **Total Participants** | 148 |
| **Country** |  |
| Lao PDR | 58 (39.2%) |
| Mongolia | 90 (60.8%) |
| **Gender** |  |
| Female | 109 (73.6%) |
| Male | 39 (26.4%) |
| **Age (years)** | 45.9 (10.4) |
| **Years of experience in the health sector** | 15.9 (9.8) |
| **Profession** |  |
| Administrative officer (Management position) | 43 (29.1%) |
| Administrative officer (Technical position) | 29 (19.6%) |
| Clinical officer (Management position) | 32 (21.6%) |
| Clinical officer (Technical position) | 44 (29.7%) |
| **Dependent Variable** |  |
| Training Effectiveness (Mean score, 1-6 scale) | 5.42 (0.79) |
| Cronbach's Alpha (Training Effectiveness) | 0.99 |
