# Supplementary material for: Unpacking the Black Box of Training Effectiveness: A Structural Equation Modelling Analysis
Source: Research Square preprint supplement (doi:10.21203/rs.3.rs-8463447/v1), 2026-01-22
Supplement: Supplementary file 3 [file 7917cfa1232ebf97e3de8199.docx]

**Table 4. Wilcoxon Rank-Sum Test Results: Comparison of Training Effectiveness by Factor Score Group**

|  | **Factor 1**  **Feasible Action Plan** | | **Factor 2**  **Collaborative Work Environment** | | **Factor 3**  **Encouraging Learning Environment** | | **Factor 4**  **Job-aligned Training and Readiness** | | **Factor 5**  **Limited Authority** | | **Factor 6**  **Altruistic Desire** | |
| --- | --- | --- | --- | --- | --- | --- | --- | --- | --- | --- | --- | --- |
| Sample | H  (n=77) | L  (n=71) | H  (n=78) | L  (n=70) | H  (n=75) | L  (n=73) | H  (n=77) | L  (n=71) | H  (n=83) | L  (n=65) | H  (n=103) | L  (n=45) |
| Rank sum | 7407.5 | 3618.5 | 7081.5 | 3944.5 | 6967.5 | 4058.5 | 7307.5 | 3718.5 | 6185.5 | 4840.5 | 8486.5 | 2539.5 |
| Expected | 5736.5 | 5289.5 | 5811.0 | 5215.0 | 5587.5 | 5438.5 | 5736.5 | 5289.5 | 6183.5 | 4842.5 | 7673.5 | 3352.5 |
| z value | 6.568 | | 4.997 | | 5.42 | | 6.175 | | 0.008 | | 3.47 | |
| P value | < 0.0001 | | < 0.0001 | | < 0.0001 | | < 0.0001 | | < 0.9937 | | < 0.0005 | |
