# Supplementary material for: Unpacking the Black Box of Training Effectiveness: A Structural Equation Modelling Analysis
Source: Research Square preprint supplement (doi:10.21203/rs.3.rs-8463447/v1), 2026-01-22
Supplement: Supplementary file 4 [file 8a7aa488bf138bd9f2e1e5ea.docx]

**Table 1. Overview of Training Programs**

|  | **Theme-Specific Training** | **Country-Specific Training** |
| --- | --- | --- |
| **Objective** | To enhance knowledge and skills on specific health topics (e.g., infectious disease control, maternal and child health). | To achieve the goals of ongoing technical cooperation projects in the participants' country. |
| **Target Audience** | Health professionals from multiple countries. | Health professionals from a single country involved in a specific project. |
| **Language** | English | Lao / Mongolian |
