# Supplementary material for: Unpacking the Black Box of Training Effectiveness: A Structural Equation Modelling Analysis
Source: Research Square preprint supplement (doi:10.21203/rs.3.rs-8463447/v1), 2026-01-22
Supplement: Supplementary file 5 [file 9a1e2efd317a745bc4e58b51.docx]

**Table 3. Summary of Identified Factors and Their Reliability**

| Factor category | Factor name | Number of items | Cronbach's Alpha |
| --- | --- | --- | --- |
| Pre-training | Factor 4: Job-aligned Training and Readiness | 11 | [0.92] |
|  | Factor 6: Altruistic Desire | 2 | [0.73] |
| During training | Factor 3: Encouraging Learning Environment | 20 | [0.92] |
| Post-training | Factor 1: Feasible Action Plan | 24 | [0.96] |
|  | Factor 5: Limited Authority | 3 | [0.78] |
| Throughout the entire period | Factor 2: Collaborative Work Environment | 27 | [0.96] |
